# Supplementary material for: A high-performance, oxidation resistance and flexible Zn@MXene/cellulose nanofibers electromagnetic shielding film
Source: Royal Society of Chemistry journal article supplement (doi:10.1039/d2ra07791d), 2023-01-01
Supplement: d2ra07791d1.pdf [file d2ra07791d1.pdf]

**High-performance, oxidation resistance and flexible Zn@MXene/cellulose nanofibers  
electromagnetic shielding film**

Yunsheng Da<sup>a,b</sup>, Qiqi Qu<sup>a,b</sup>, Ling Kong<sup>b</sup>, Qiang Liu<sup>a,b</sup>, Menghan Zhu<sup>a,b</sup>, Yiming Du<sup>a,b</sup>, Xingyou Tian<sup>a</sup>,

Yanyan Liu<sup>a,\*</sup>, Hua Wang<sup>a,\*</sup>

<sup>a</sup> Key Lab of Photovoltaic and Energy Conservation Materials, Institute of Solid State Physics, HFIPS,  
Chinese Academy of Sciences, Hefei 230031, China

<sup>b</sup> University of Science and Technology of China, Hefei 230026, People's Republic of China

\*Corresponding authors at: 2221 Changjiang West Road, Shushan District, Hefei City, Anhui Province,  
People's Republic of China.

E-mail addresses: [wanghua@issp.ac.cn](mailto:wanghua@issp.ac.cn) (Hua Wang), [liyanyan@rntek.cas.cn](mailto:liyanyan@rntek.cas.cn) (Yanyan Liu)

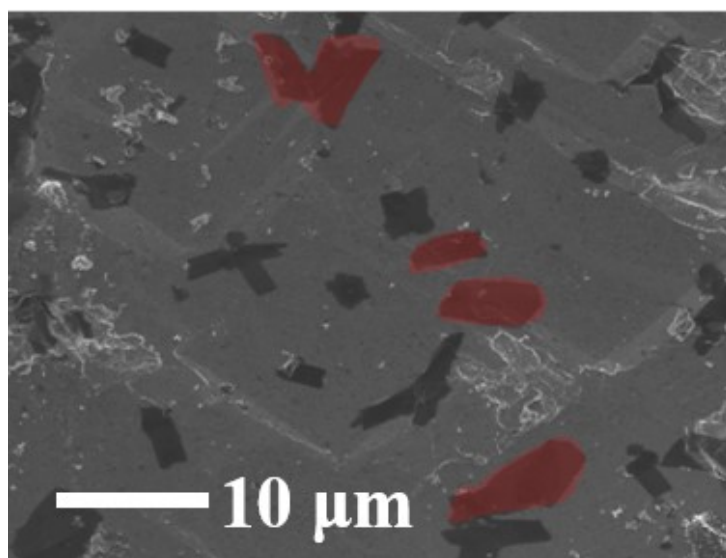

**Fig. S1. Scanning electron microscopy (SEM) image of Ti<sub>3</sub>C<sub>2</sub>T<sub>x</sub>**

**MXene**

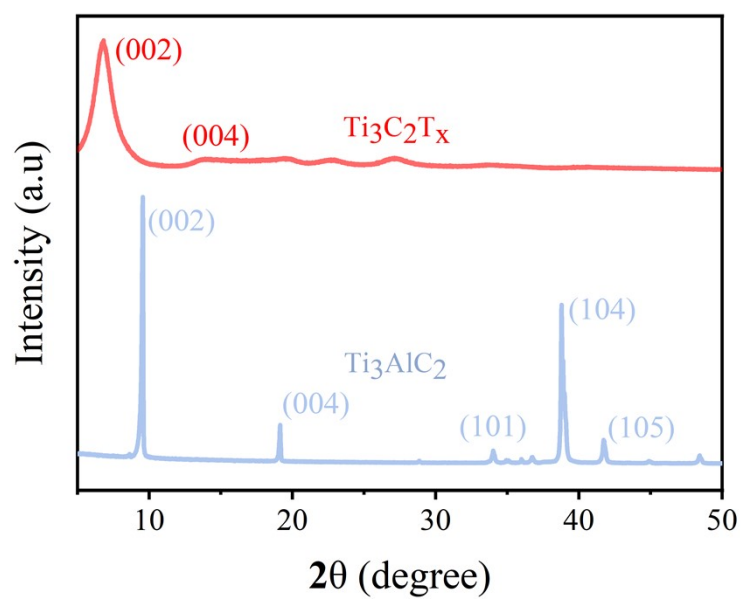

**Fig. S2. XRD spectrogram for Ti<sub>3</sub>AlC<sub>2</sub> MAX and Ti<sub>3</sub>C<sub>2</sub>T<sub>x</sub>**

**MXene**

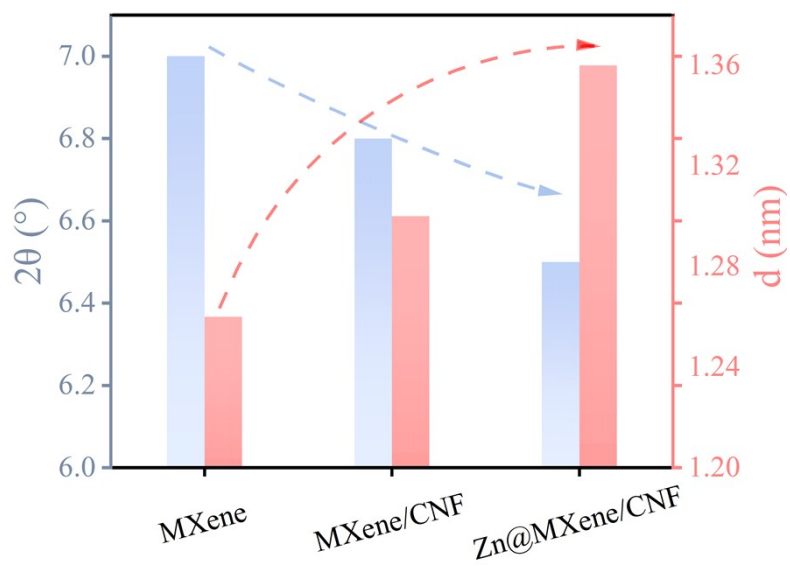

**Fig. S3. Enhancement of MXene nanosheets lamellar spacing**

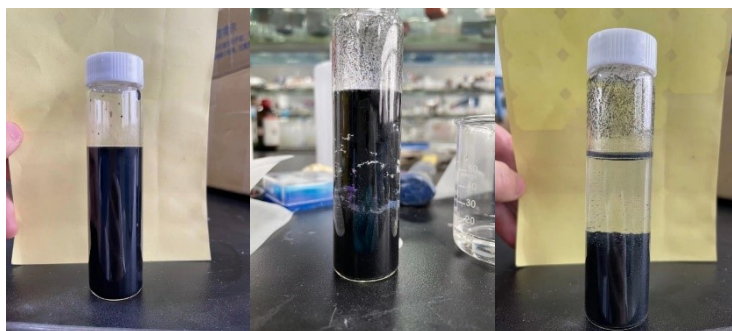

**Fig. S4 Schematic diagram of self-assembly process**

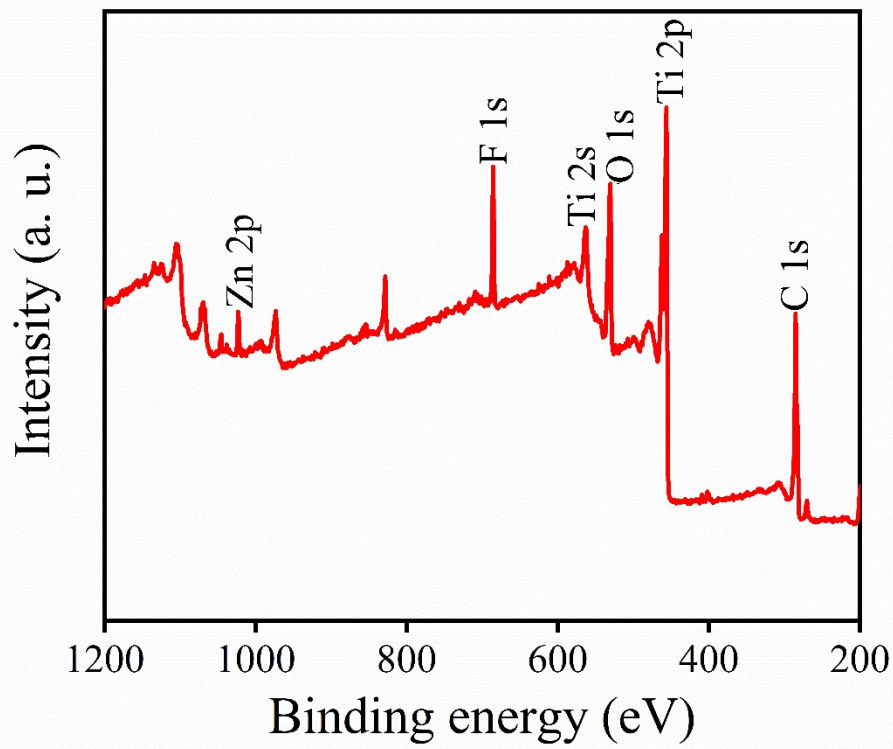

Fig. S5 XPS of Zn@MXene/CNF composite film

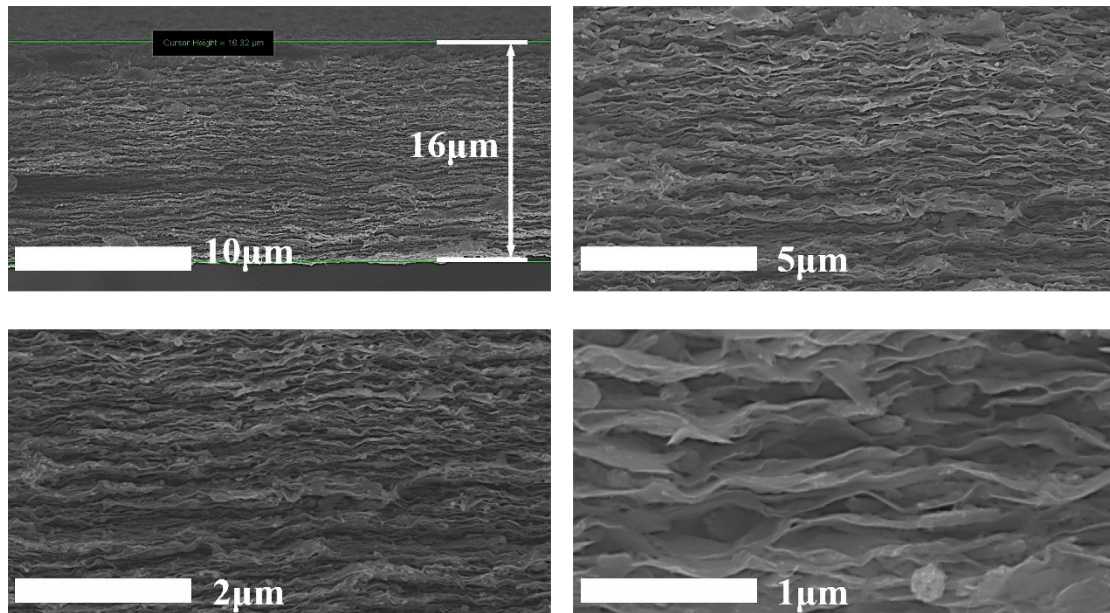

Fig. S6 SEM picture for cross section of film before hot-pressing

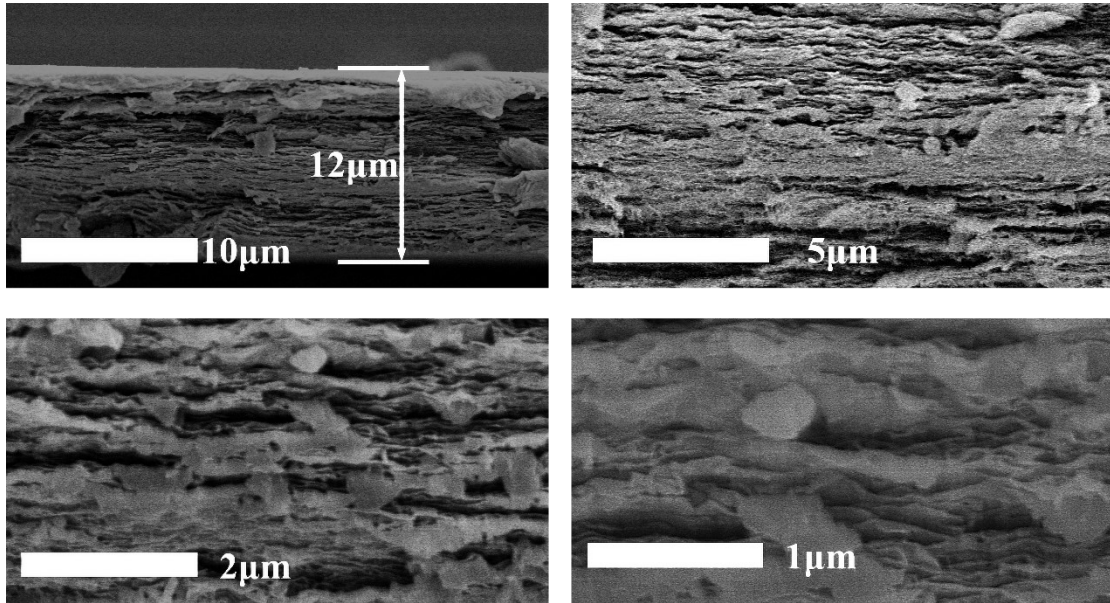

**Fig. S7 SEM picture for cross section of film after hot-pressing**

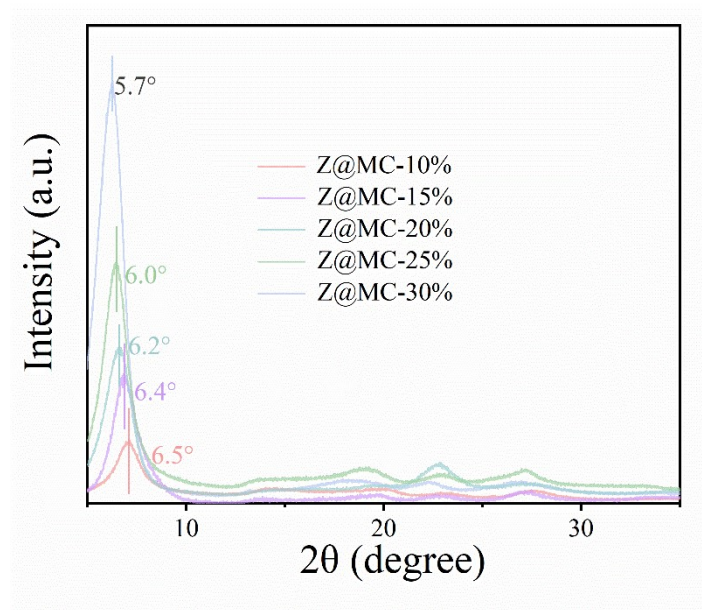

**Fig. S8 X-ray diffraction (XRD) patterns of the Zn@Ti<sub>3</sub>C<sub>2</sub>T<sub>x</sub> MXene/CNF samples**

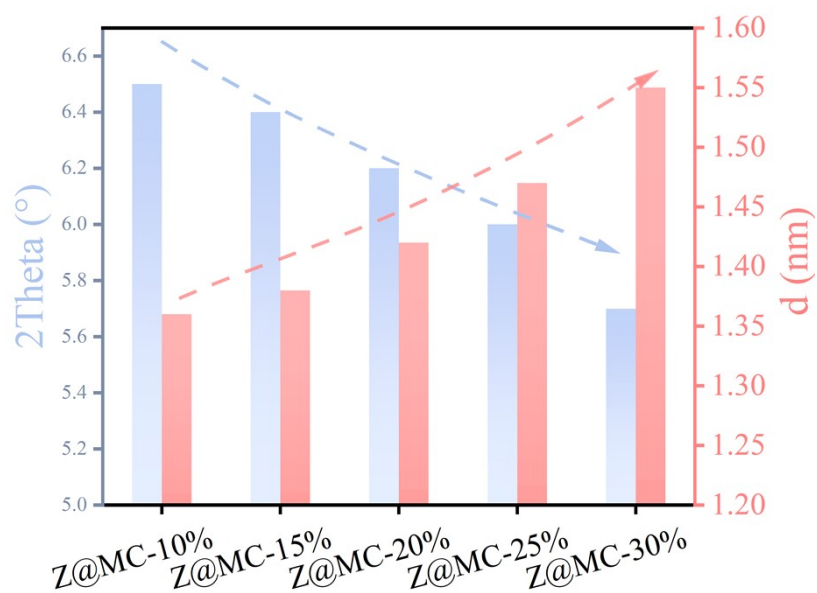

**Fig. S9 Enhancement of MXene nanosheets lamellar spacing**

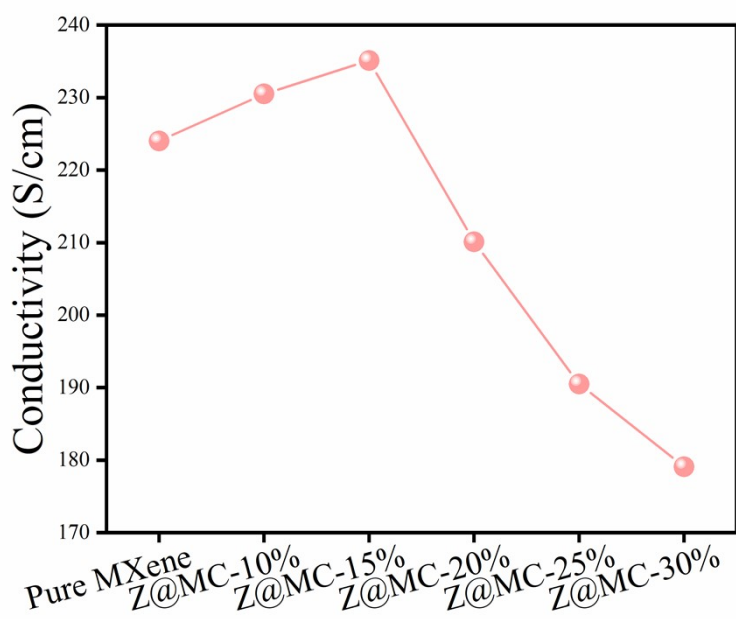

**Fig. S10 Electrical conductivity of film samples**
